# Supplementary material for: Inkjet printing of conductive patterns and supercapacitors using a multi-walled carbon nanotube/Ag nanoparticle based ink
Source: Royal Society of Chemistry journal article supplement (doi:10.1039/c4ta05625f), 2014-11-28
Supplement: c4ta05625f1.pdf [file c4ta05625f1.pdf]

## Supplementary Information for

### **Inkjet Printing of Conductive Patterns and Supercapacitors Using Multi-Walled Carbon Nanotubes/Ag Nanoparticles Based Ink**

**Siliang Wang,<sup>a</sup> Nishuang Liu,<sup>\*a</sup> Jiayou Tao,<sup>a</sup> Congxing Yang,<sup>a</sup> Weijie Liu,<sup>a</sup> Yuling Shi,<sup>a</sup>  
Yumei Wang,<sup>a</sup> Jun Su,<sup>a</sup> Luying Li,<sup>a</sup> and Yihua Gao<sup>\*ab</sup>**

<sup>a</sup>Center for Nanoscale Characterization & Devices (CNCD), Wuhan National Laboratory for Optoelectronics (WNLO) & School of Physics, Huazhong University of Science and Technology (HUST), Luoyu Road 1037, Wuhan 430074, China

<sup>b</sup>Hubei Collaborative Innovation Center for Advanced Organic Chemical Materials, 368 Youyi Avenue, Wuhan 430062, China

1. The volumetric capacitance of the device can be calculated from CV results by the following equations:

$$C = A / (2 \times s \times \Delta U) \quad (1)$$

$$C_V = C / V = A / (2 \times s \times V \times \Delta U) \quad (2)$$

where  $C$  is the capacitance of the ASC,  $A$  is the area of CV curve,  $s$  is the scan rate,  $\Delta U$  is the potential window,  $C_V$  is the volumetric capacitance, and  $V$  is the total volume of the electrodes.

2. The volumetric capacitance of the device can be calculated from galvanostatic charge-discharge results by the following equations:

$$C = I \times \Delta t / \Delta U \quad (3)$$

$$C_V = C / V = I \times \Delta t / (V \times \Delta U) \quad (4)$$

where  $C$  is the capacitance of the ASC,  $I$  is the discharge current,  $\Delta t$  is the discharge time,  $\Delta U$  is the potential window during the discharge process,  $C_V$  is the volumetric capacitance, and  $V$  is the total volume of the electrodes.

3. The energy density and average power density derived from the GCD of the device can be calculated from the following equations:

$$D_E = 0.5 C_V (\Delta U)^2 \quad (5)$$

$$D_P = 3600 D_E / \Delta t \quad (6)$$

where  $D_E$  is the energy density,  $C_V$  is the volumetric capacitance which can be obtained through Eq. 4,  $\Delta U$  is the potential window,  $D_P$  is the volumetric power density and  $\Delta t$  is the discharge time.

4. The capacity retention (CR) and Coulombic efficiency (CE) can be calculated from galvanostatic charge-discharge results by the following equations:

$$CR = \Delta t / \Delta t_0 \quad (7)$$

$$CE = \Delta t_d / \Delta t_c \quad (8)$$

Where  $\Delta t$  is the discharge time of different cycles,  $\Delta t_0$  is initial discharge time,  $\Delta t_d$  is the discharge time and  $\Delta t_c$  is the charge time in same cycle.

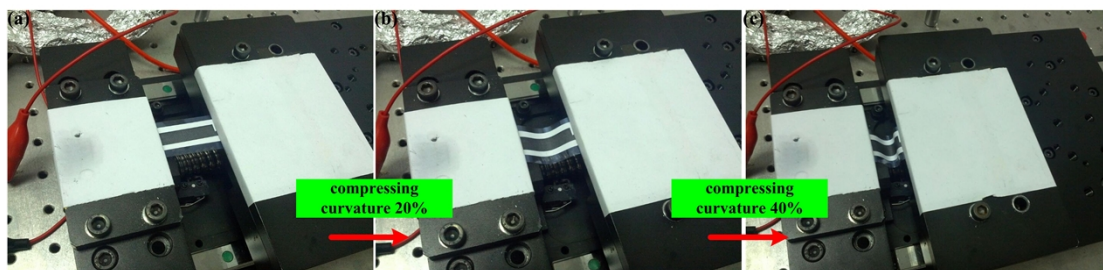

**Figure S1** Compressing process of Ag-MWCNT electrode. (a) initial state. (b) compressing for curvature of 20%. (c) compressing for curvature of 40%.

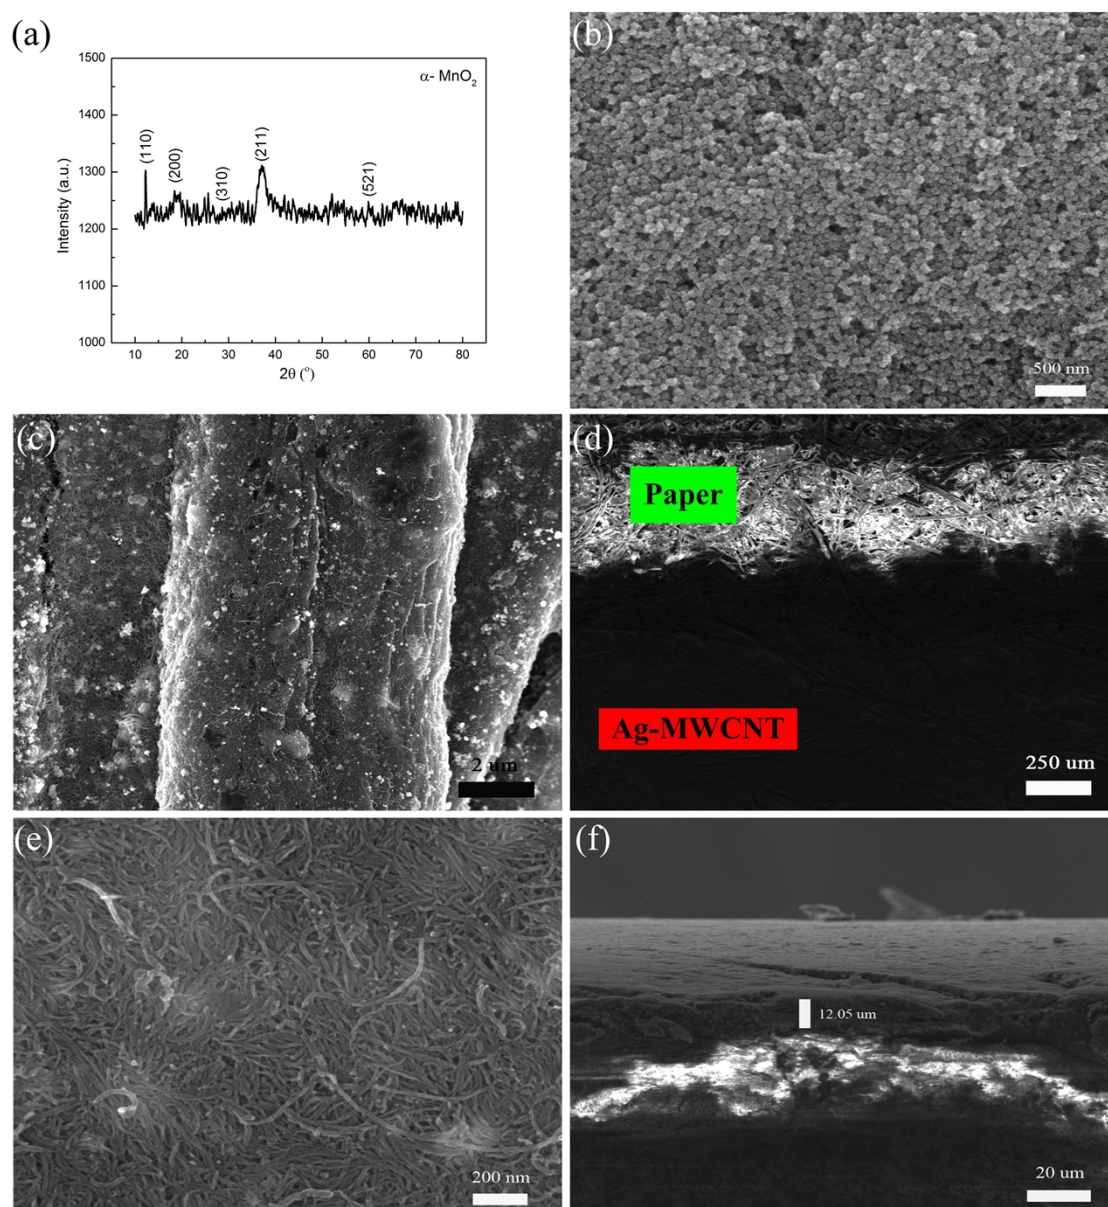

**Figure S2** (a) The XRD pattern of  $\text{MnO}_2$  prepared by simple solution method. (b) The SEM image of  $\text{MnO}_2$  nanoparticles. (c) The SEM image of Ag and MWCNTs located on paper fiber. (d) The SEM of boarder of printed area. The SEM images of filtrated MWCNTs: (e) the surface morphologies (f) the cross-section showing thickness.

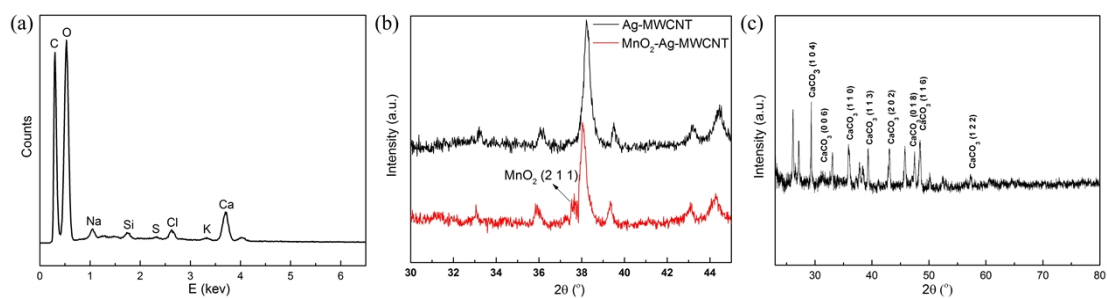

Figure S3 (a) EDS of pure paper. (b) The magnified portion of XRD patterns of Ag-MWCNT and  $\text{MnO}_2$ -Ag-MWCNT. (c) XRD pattern of pure paper.

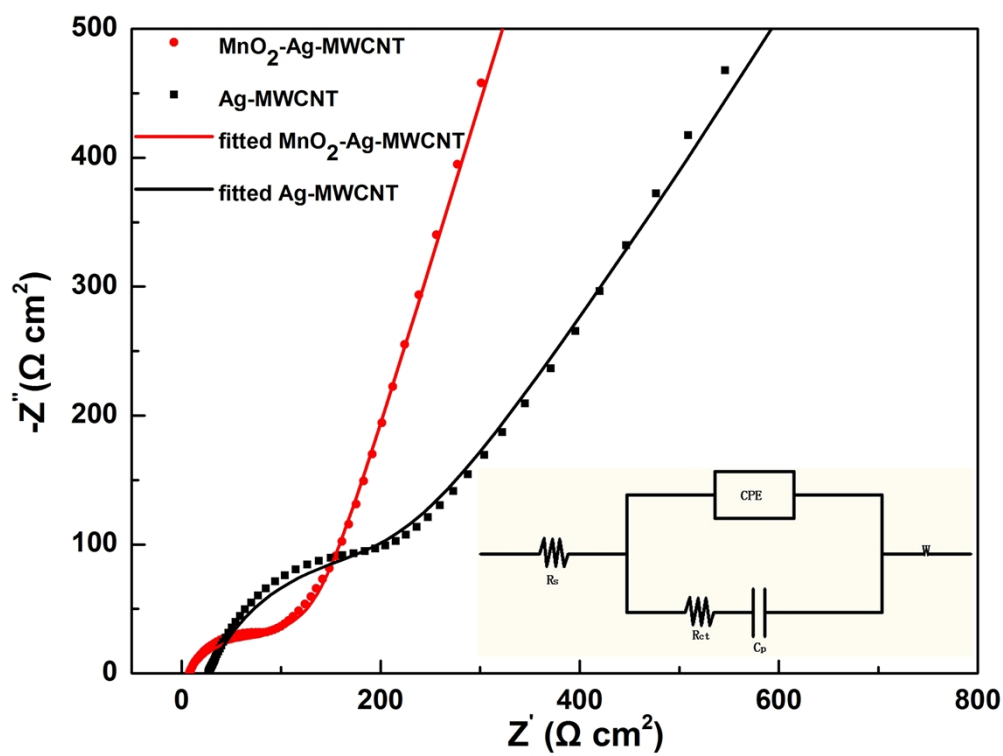

Figure S4 Nyquist plot of the electrodes. Dots are the experimental results and lines are the fitted Nyquist plots, inset is the equivalent circuit model.

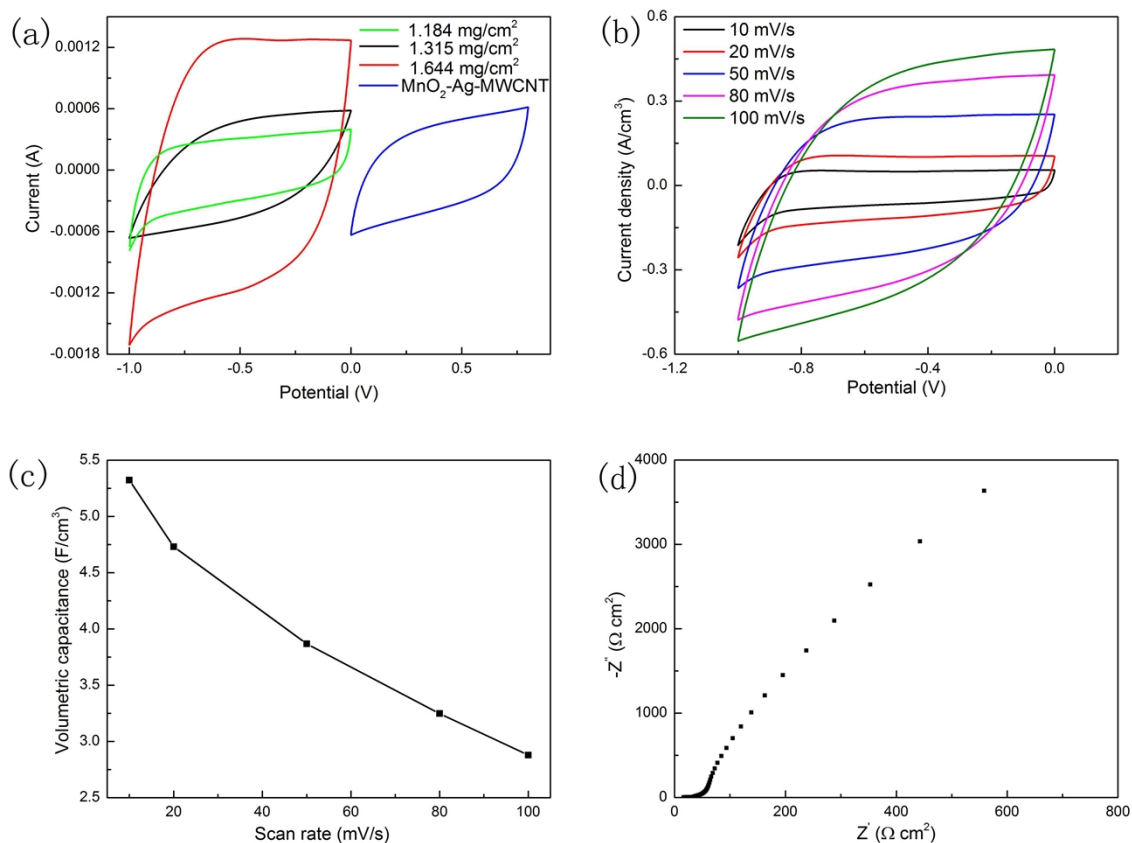

**Figure S5** Electrochemical performance of the filtrated MWCNT negative electrode. (a) CV curves of the cathodes with different mass density and of the MnO<sub>2</sub>-Ag-MWCNT anode (the scan rate of 0.1 V s<sup>-1</sup>). (b) CV curves of the cathode with scan rate from 0.01 to 0.1 V s<sup>-1</sup> (c) Volumetric capacitance VS scan rate. (d) Nyquist plot.
